# Supplementary material for: Taming electronic properties of boron nitride nanosheets as metal-free catalysts for aerobic oxidative desulfurization of fuels
Source: Royal Society of Chemistry journal article supplement (doi:10.1039/c8gc01625a), 2018-01-01
Supplement: c8gc01625a1.pdf [file c8gc01625a1.pdf]

## Supplementary Information

### **Taming electronic properties of boron nitride nanosheets as metal-free catalysts for aerobic oxidative desulfurization of fuels**

Linjie Lu,<sup>a</sup> Jing He,<sup>a</sup> Peiwen Wu,<sup>a</sup> Yingcheng Wu,<sup>a</sup> Yanhong Chao,<sup>a</sup> Hongping Li,<sup>a</sup> Duanjian Tao,<sup>b</sup>

Lei Fan,<sup>c</sup> Huaming Li,<sup>a</sup> and Wenshuai Zhu<sup>\*a</sup>

<sup>a</sup> School of Chemistry and Chemical Engineering, Institute for Energy Research, Jiangsu University, Zhenjiang, Jiangsu 212013, P. R. China

<sup>b</sup> College of Chemistry and Chemical Engineering, Jiangxi Normal University, Nanchang 330022, P. R. China

<sup>c</sup> Yangzhou University, Yangzhou, Jiangsu 225002, P. R. China

\* E-mail: zhuws@ujs.edu.cn

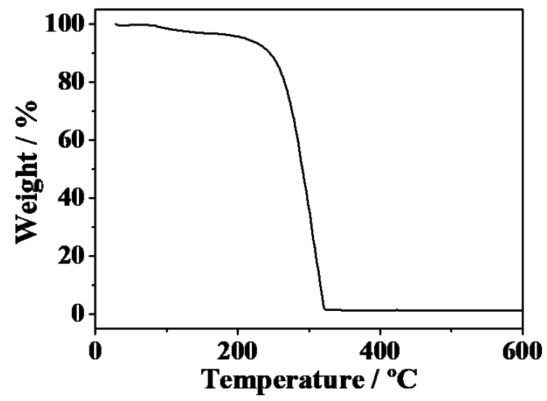

Figure S1. TGA curve of [C16mim]Cl.

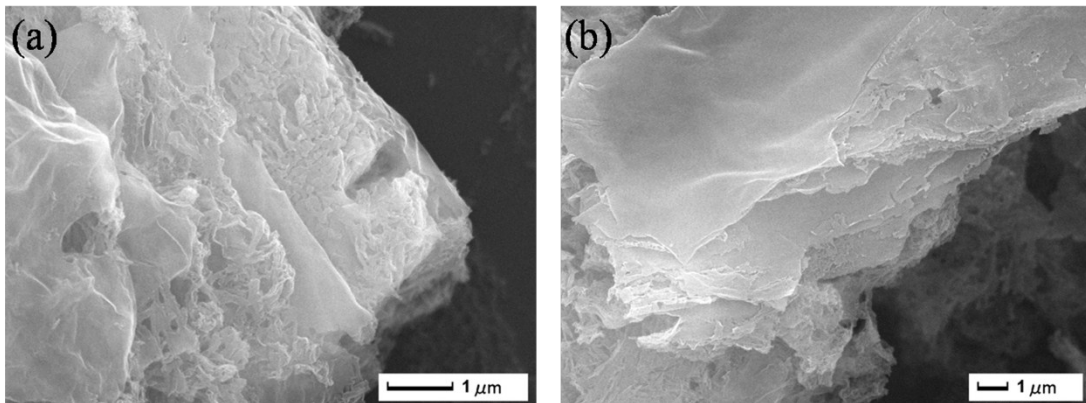

Figure S2. SEM images of h-BN.

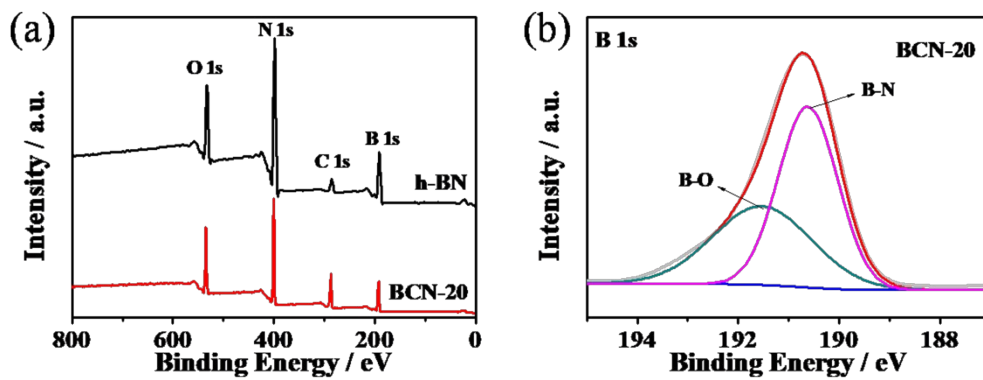

Figure S3. (a) XPS survey spectra of h-BN and BCN-20; (b) B 1s core-level spectrum of BCN-20.

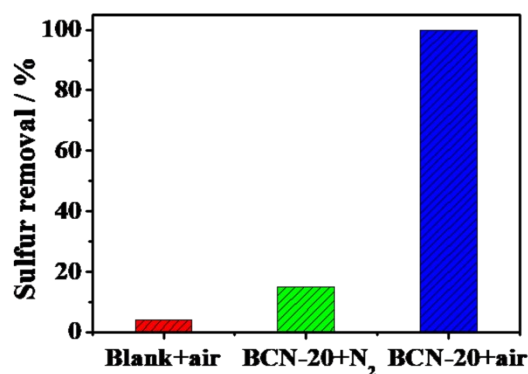

Figure S4. Catalytic oxidation of DBT under different conditions. Experiment conditions:  $m$  (catalyst) = 70 mg,  $V$  (model oil) = 20 mL,  $v$  (gas) = 100 mL·min<sup>-1</sup>,  $T$  = 100 °C.

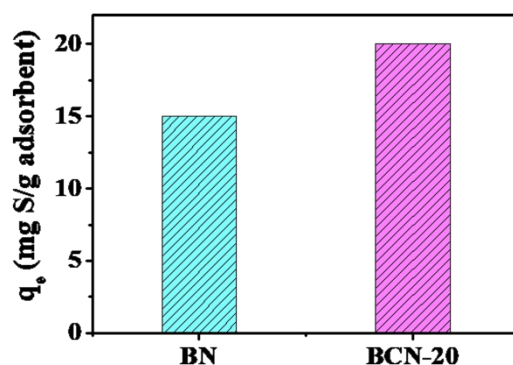

Figure S5. The adsorption capacity of different samples. Experiment conditions:  $m$  (adsorbent) = 70 mg,  $V$  (model oil) = 20 mL,  $T$  = 25 °C,  $C_0$  (oil) = 200 ppm.

The experimental procedure for the determination of adsorption capacity is as follows: 70 mg of adsorbent and 20 mL model oil were added into a 50mL conical flask and then fixed in shaker equipment with a water bath maintained at 25 °C. The residual sulfur concentration after the adsorption was analyzed by a gas chromatograph instrument (GC Agilent-7890A, equipped with a flame ionization detector (FID) and HP-5 column (30 m long×0.32 mm inner diameter (id) 0.25 μm film thickness).

The adsorbed capacity ( $q_e$ ) of the sulfur compounds at equilibrium (mg g<sup>-1</sup>) was calculated by the following equation:

$$q_e = \frac{(C_0 - C_e)V}{m}$$

where  $C_0$  and  $C_e$  (mg L<sup>-1</sup>) were the initial and equilibrium sulfur concentration, respectively,  $V$  (L) was the volume of model oil, and  $m$  (g) was the quality of adsorbent.

The thermodynamic studies showed that the adsorption is an exothermic process, which means that the adsorption capacity will decrease with the increase of adsorption temperature<sup>1</sup>. Therefore, 25 °C was favorable for the adsorptive experiment.

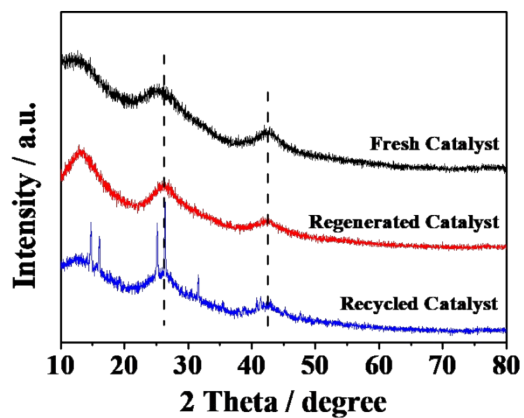

Figure S6. XRD patterns of fresh, recycled and regenerated BCN-x.

#### Notes and References

1. G. Miao, F. Y. Ye, L. M. Wu, X. L. Ren, J. Xiao, Z. Li and H. H. Wang, *J. Hazard. Mater.*, 2015, **300**, 426-432.
